# Supplementary material for: Mechanism of conditional partner selectivity in MITF/TFE family transcription factors with a conserved coiled coil stammer motif
Source: PubMed Central journal article supplement — Nucleic Acids Res. 2019 Nov 28;48(2):934–48. doi: 10.1093/nar/gkz1104 (PMC6954422; doi:10.1093/nar/gkz1104), 2019-11-28
Supplement: gkz1104_supplemental_file.pdf [file gkz1104_supplemental_file.pdf]

## SUPPLEMENTARY INFORMATION

**Supplementary Table 1:** X-ray structure determination

|                                           |                              |
|-------------------------------------------|------------------------------|
| <b>Data collection</b>                    |                              |
| Space group                               | C222 <sub>1</sub>            |
| Unit cell dimensions [Å]                  | a = 38.7, b = 92.8, c = 86.8 |
| Wavelength [Å]                            | 0.8726                       |
| Resolution range [Å] <sup>a</sup>         | 33.04-2.05 (2.16-2.05)       |
| Unique reflections                        | 9,762 (987)                  |
| Multiplicity <sup>a</sup>                 | 3.8 (3.8)                    |
| Mean I/σ <sub>(I)</sub> <sup>a</sup>      | 7.8 (3.5)                    |
| Wilson B-factor [Å <sup>2</sup> ]         | 32.6                         |
| Completeness [%] <sup>a</sup>             | 96.5 (98.0)                  |
| Half-set correlation (CC <sub>1/2</sub> ) | 0.99 (0.88)                  |
| R <sub>sym</sub> <sup>b</sup> [%]         | 10.8 (30.3)                  |
| <b>Refinement</b>                         |                              |
| Number of protein atoms                   | 1181                         |
| Number of other atoms                     | 43                           |
| R <sub>cryst</sub> [%] <sup>c,d</sup>     | 22.4                         |
| R <sub>free</sub> [%] <sup>e</sup>        | 24.6                         |
| R.m.s.d. bond lengths [Å]                 | 0.016                        |
| R.m.s.d. angles [°]                       | 1.33                         |
| Mean B-factors [Å <sup>2</sup> ]          | 43.6                         |
| Protein                                   | 43.2                         |

|                                      |                                                                    |
|--------------------------------------|--------------------------------------------------------------------|
| Solvent                              | 43.1                                                               |
| <i>Ramachandran plot:</i>            |                                                                    |
| Favored regions [%]                  | 100                                                                |
| Clash score (Chen et al., 2010)      | 2.1                                                                |
| Residue segments interpreted         | A: 220-294<br>B: 217-293                                           |
| Residues with incomplete side chains | A: K233, N235, D236, R240<br>B: R217, K248, K265, K272, K273, R293 |

<sup>a</sup> Values in parentheses refer to the highest resolution shell.

<sup>b</sup>  $R_{\text{sym}} (I) = \frac{\sum_{\text{hkl}} \sum_i | I_{\text{hkl}, i} - \langle I_{\text{hkl}, i} \rangle |}{\sum_{\text{hkl}} \sum_i | I_{\text{hkl}, i} |}$  where  $\langle I_{\text{hkl}, i} \rangle$  is the mean intensity of symmetry-related measurements of the reflections.

<sup>c</sup>  $R_{\text{cryst}} = \frac{\sum_{\text{hkl}} | F_{\text{obs}} - F_{\text{calc}} |}{\sum_{\text{hkl}} | F_{\text{obs}} |}$

<sup>d</sup>  $R_{\text{free}}$  is as  $R_{\text{cryst}}$  but calculated over 9 % of data that were excluded from the refinement process.

<sup>e</sup> RMSD is the root-mean square deviation from ideal geometry.

**Supplementary Table 2:** Complete searches for validated MITF-related structural targets

| Query       | Group representative | Rank of representative | TM Query cover [%] | TM Target cover [%] | TM Alignment length | RMS [Å] | TM Sequence identity |
|-------------|----------------------|------------------------|--------------------|---------------------|---------------------|---------|----------------------|
| <b>4ATH</b> | 4ATH                 | 1                      | 100,0              | 100,0               | 162                 | 0,0     | 100,0                |
|             | 6FX5                 | 2                      | 83,2               | 92,4                | 145                 | 2,0     | 55,2                 |
|             | 6G1L                 | 13                     | 75,7               | 77,6                | 128                 | 1,5     | 96,9                 |
|             | 1R05                 | 13                     | 75,6               | 70,4                | 141                 | 2,7     | 15,6                 |
|             | 1NKP                 | 20                     | 71,4               | 67,6                | 134                 | 2,8     | 20,9                 |
|             | 5EYO                 | 29                     | 77,0               | 71,7                | 137                 | 2,2     | 16,1                 |
|             | 5I4Z                 | 35                     | 69,5               | 76,1                | 124                 | 2,2     | 24,2                 |
|             | 1AN2                 | 51                     | 68,2               | 64,3                | 121                 | 2,2     | 18,2                 |
|             | 1AM9                 | 59                     | 67,7               | 35,1                | 118                 | 2,0     | 34,7                 |
|             | 5GNJ                 | 78                     | 66,5               | 73,8                | 116                 | 2,0     | 19,0                 |
|             | 4ATI                 | 84                     | 66,2               | 83,8                | 110                 | 1,2     | 96,4                 |
|             | 1HLO                 | 124                    | 64,0               | 67,8                | 111                 | 1,9     | 19,8                 |
|             | 1UKL                 | 182                    | 61,9               | 10,0                | 107                 | 1,8     | 28,0                 |
|             | 4ATK                 | 194                    | 61,2               | 82,6                | 102                 | 1,2     | 94,1                 |
|             | 2YPB                 | 309                    | 56,8               | 65,3                | 99                  | 2,0     | 25,3                 |
|             | 3U5V                 | 501                    | 54,0               | 70,5                | 94                  | 2,0     | 26,6                 |
|             | 2YPA                 | 606                    | 56,3               | 30,8                | 97                  | 1,8     | 24,7                 |
|             | 4F3L                 | 637                    | 52,0               | 13,6                | 90                  | 1,9     | 30,0                 |
|             | 4H10                 | 660                    | 51,6               | 68,0                | 87                  | 1,5     | 31,0                 |
|             | 5Y7Y                 | 676                    | 51,3               | 17,9                | 87                  | 1,5     | 26,4                 |
| <b>6G1L</b> | 6G1L                 | 1                      | 100,0              | 100,0               | 158                 | 0,0     | 100,0                |
|             | 5EYO                 | 3                      | 86,5               | 78,6                | 146                 | 1,9     | 23,3                 |
|             | 1AM9                 | 5                      | 85,6               | 43,2                | 143                 | 1,7     | 36,4                 |
|             | 1NKP                 | 7                      | 83,7               | 77,3                | 142                 | 1,9     | 26,8                 |
|             | 1HLO                 | 8                      | 83,3               | 86,1                | 141                 | 1,9     | 24,1                 |
|             | 1AN2                 | 10                     | 80,6               | 74,0                | 139                 | 2,2     | 24,5                 |
|             | 4ATH                 | 14                     | 77,6               | 75,7                | 128                 | 1,5     | 96,9                 |
|             | 2YPB                 | 16                     | 75,7               | 84,8                | 126                 | 1,7     | 26,2                 |
|             | 2YPA                 | 17                     | 75,5               | 40,3                | 126                 | 1,7     | 26,2                 |
|             | 5GNJ                 | 18                     | 74,7               | 80,8                | 126                 | 1,9     | 25,4                 |
|             | 4ATK                 | 19                     | 74,3               | 97,9                | 120                 | 1,1     | 98,3                 |
|             | 4ATI                 | 20                     | 74,1               | 91,4                | 127                 | 2,1     | 70,9                 |
|             | 6FX5                 | 21                     | 72,0               | 78,0                | 120                 | 1,6     | 67,0                 |
|             | 1R05                 | 21                     | 70,7               | 64,2                | 124                 | 2,3     | 21,0                 |
|             | 4H10                 | 22                     | 69,5               | 89,3                | 115                 | 1,6     | 32,2                 |
|             | 1MDY                 | 23                     | 69,2               | 84,2                | 114                 | 1,4     | 22,8                 |
|             | 5I4Z                 | 42                     | 66,2               | 70,6                | 116                 | 2,3     | 25,9                 |
|             | 4ZPK                 | 67                     | 64,9               | 17,4                | 112                 | 2,2     | 26,8                 |
|             | 2QL2                 | 77                     | 64,1               | 44,1                | 105                 | 1,3     | 25,7                 |

|             |             |            |              |              |            |            |             |
|-------------|-------------|------------|--------------|--------------|------------|------------|-------------|
| 2QL2        | 89          | 63,4       | 87,2         | 104          | 1,4        | 26,0       |             |
| 1UKL        | 93          | 62,9       | 10,0         | 105          | 1,7        | 28,6       |             |
| 4ZPR        | 104         | 62,0       | 19,1         | 103          | 1,6        | 29,1       |             |
| 3U5V        | 113         | 60,7       | 77,3         | 100          | 1,5        | 32,0       |             |
| 2MH3        | 117         | 60,4       | 68,2         | 106          | 2,3        | 37,7       |             |
| 5NJ8        | 118         | 60,4       | 27,3         | 101          | 1,7        | 33,7       |             |
| 5SY7        | 121         | 59,8       | 17,1         | 101          | 1,9        | 30,7       |             |
| 1A0A        | 123         | 59,6       | 74,8         | 100          | 1,8        | 35,0       |             |
| 1AN4        | 129         | 59,3       | 72,1         | 105          | 2,5        | 41,9       |             |
| 5NJ8        | 131         | 59,0       | 30,1         | 99           | 1,8        | 31,3       |             |
| 4F3L        | 142         | 57,5       | 14,6         | 96           | 1,7        | 35,4       |             |
| 5Y7Y        | 227         | 55,8       | 19,0         | 94           | 1,8        | 30,9       |             |
| 5V0L        | 247         | 55,1       | 25,5         | 94           | 2,0        | 35,1       |             |
| 5SY5        | 347         | 51,4       | 4,9          | 87           | 2,0        | 33,3       |             |
| 3N50        | 466         | 47,4       | 24,9         | 82           | 2,2        | 22,0       |             |
| 3N50        | 467         | 47,4       | 8,4          | 82           | 2,2        | 22,0       |             |
| 2LFH        | 491         | 46,7       | 54,3         | 80           | 2,0        | 27,5       |             |
| 4ZQD        | 642         | 44,2       | 13,1         | 77           | 2,2        | 27,3       |             |
| <b>6FX5</b> | <b>6FX5</b> | <b>1</b>   | <b>100,0</b> | <b>100,0</b> | <b>146</b> | <b>0,0</b> | <b>100</b>  |
|             | <b>4ATH</b> | <b>2</b>   | <b>92,4</b>  | <b>83,2</b>  | <b>145</b> | <b>2,0</b> | <b>55,2</b> |
|             | <b>1R05</b> | <b>5</b>   | <b>84,5</b>  | <b>70,9</b>  | <b>137</b> | <b>2,4</b> | <b>22,6</b> |
|             | <b>1NKP</b> | <b>8</b>   | <b>82,9</b>  | <b>70,8</b>  | <b>131</b> | <b>2,0</b> | <b>21,4</b> |
|             | <b>5I4Z</b> | <b>9</b>   | <b>81,8</b>  | <b>80,7</b>  | <b>137</b> | <b>2,7</b> | <b>22,6</b> |
|             | 1AN2        | 19         | 78,2         | 66,4         | 131        | 2,8        | 22,1        |
|             | <b>6G1L</b> | <b>20</b>  | <b>78,0</b>  | <b>72,0</b>  | <b>120</b> | <b>1,6</b> | <b>67</b>   |
|             | 5GNJ        | 53         | 76,2         | 76,2         | 122        | 2,2        | 18,9        |
|             | <b>1AM9</b> | <b>62</b>  | <b>75,1</b>  | <b>35,0</b>  | <b>116</b> | <b>1,8</b> | <b>33,6</b> |
|             | 1UKL        | 114        | 69,9         | 10,2         | 108        | 1,7        | 35,2        |
|             | 1HLO        | 120        | 69,5         | 66,4         | 107        | 1,6        | 19,6        |
|             | <b>4ATI</b> | <b>153</b> | <b>68,0</b>  | <b>77,6</b>  | <b>103</b> | <b>1,4</b> | <b>70,9</b> |
|             | <b>4ATK</b> | <b>355</b> | <b>61,7</b>  | <b>75,0</b>  | <b>93</b>  | <b>1,3</b> | <b>82,8</b> |
|             | <b>2YPB</b> | <b>372</b> | <b>58,6</b>  | <b>60,6</b>  | <b>91</b>  | <b>1,8</b> | <b>28,6</b> |
|             | 2YPA        | 485        | 59,6         | 29,4         | 93         | 1,9        | 28          |
|             | <b>4H10</b> | <b>613</b> | <b>55,9</b>  | <b>66,4</b>  | <b>88</b>  | <b>2,0</b> | <b>33</b>   |
|             | 1MDY        | 670        | 53,8         | 60,4         | 84         | 1,9        | 26,2        |
|             | 3U5V        | 711        | 53,6         | 63,1         | 83         | 1,7        | 30,1        |

**Caption Supplementary Table 2:** Validated targets for 4ATH, 6GIL and 6FX5 (for further details see Materials & Methods Section. Extracted values from TopSearch Tables (1): MITF structures, red; related HLH-bZip homo-dimers, green; related HLH-bZip hetero-dimers, blue (cf. Table 2). All remaining targets are in black.

## SUPPLEMENTARY FIGURES

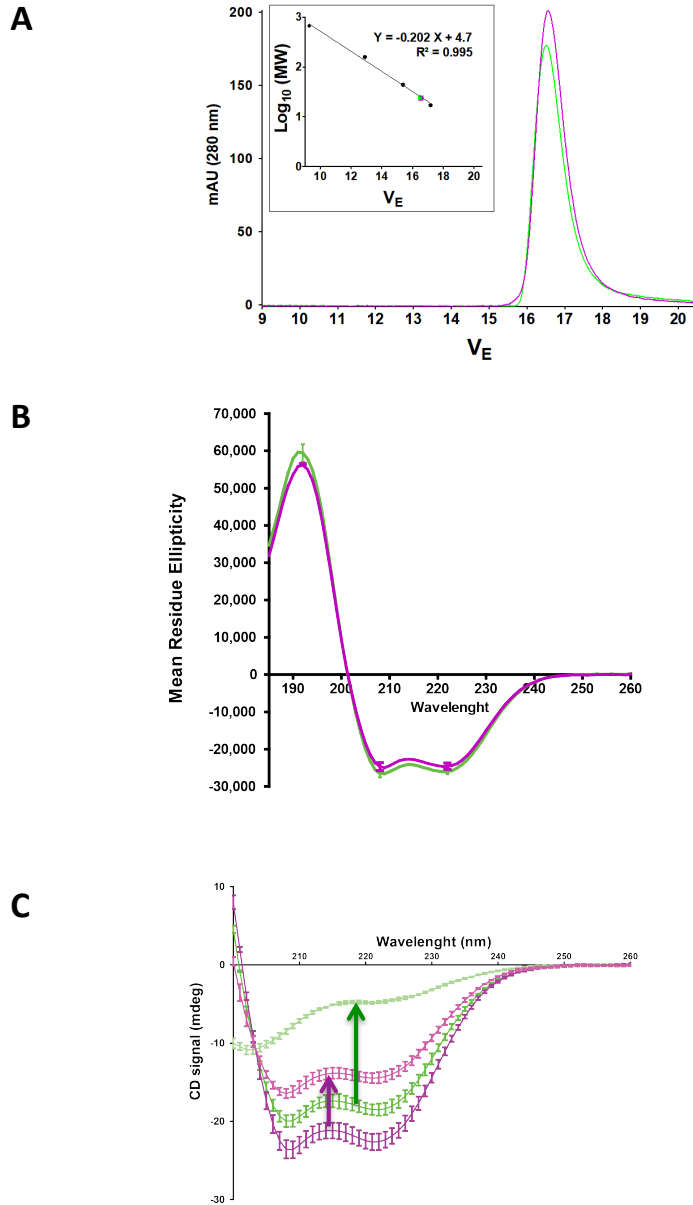

**Supplementary Figure 1: Biophysical characterization of MITF variants.** **A)** Gel filtration data of MITF(*wt*) and MITF( $\Delta$ ). According to the column calibration, the elution volumes correspond to molecular weight of 24 kDa for MITF, consistent with a homodimeric species. **B)** CD spectra of MITF (*wt*) and MITF ( $\Delta$ ); **C)** CD spectra focusing on the wavelength window 200-260 nm of MITF(*wt*) and MITF( $\Delta$ ) before and after Proteinase K digestion, indicated by arrows. Color codes are as in **Figure 1**.

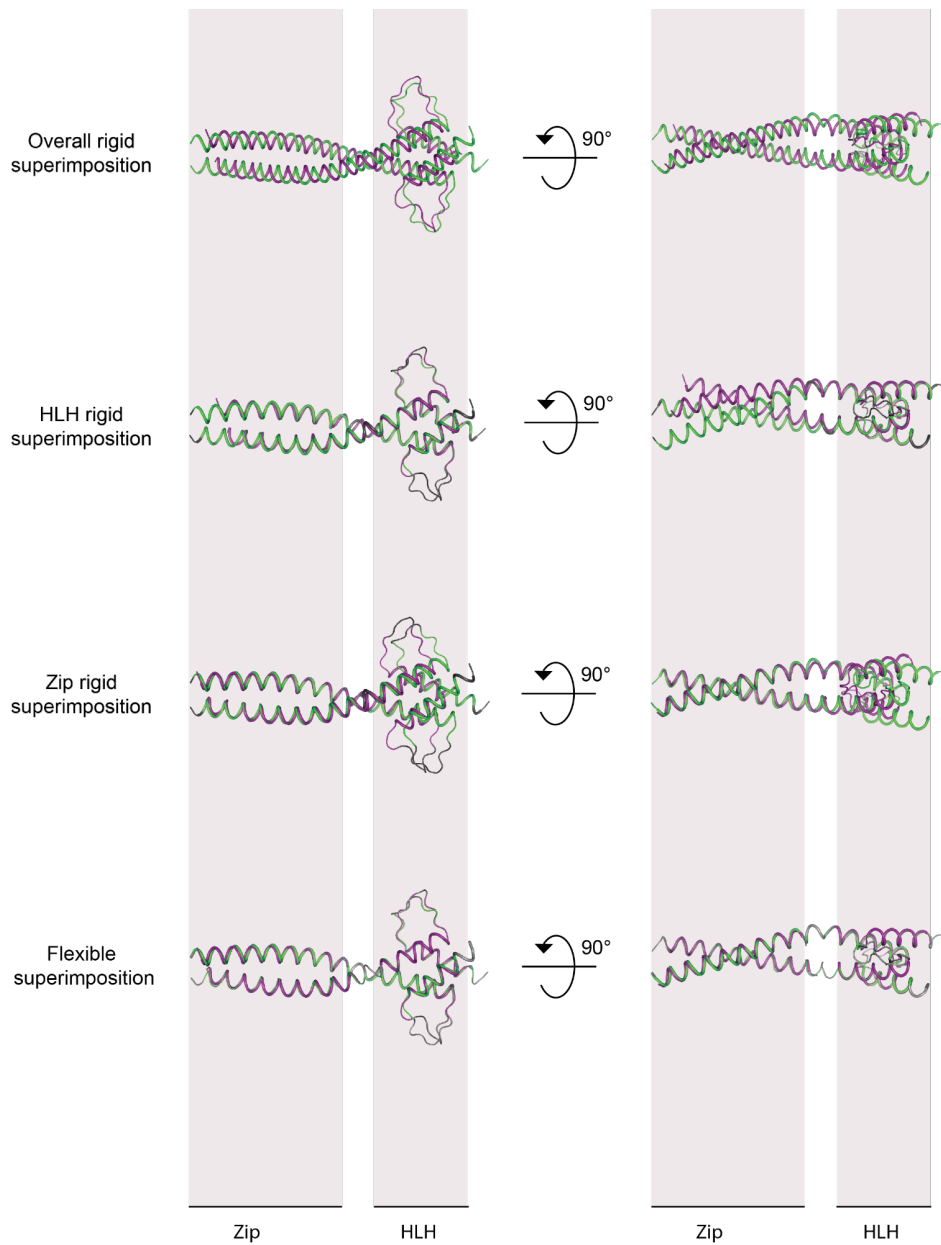

**Supplementary Figure 2:** Overall and segmental superimpositions of MITF( $\Delta$ ) and MITF(*wt*). The analysis revealed the presence of two conserved subdomains, one constituted of the HLH domain interrupted by few flexible amino acids in the loop region and the other one by the leucine zipper). Independent alignments of these rigid bodies from the two MITF variants result in r.m.s.d. of 0.57 Å on 72 aligned residues for the HLH and 0.67 Å on 63 aligned residues for the zipper. Color codes are as in **Figure 1**.

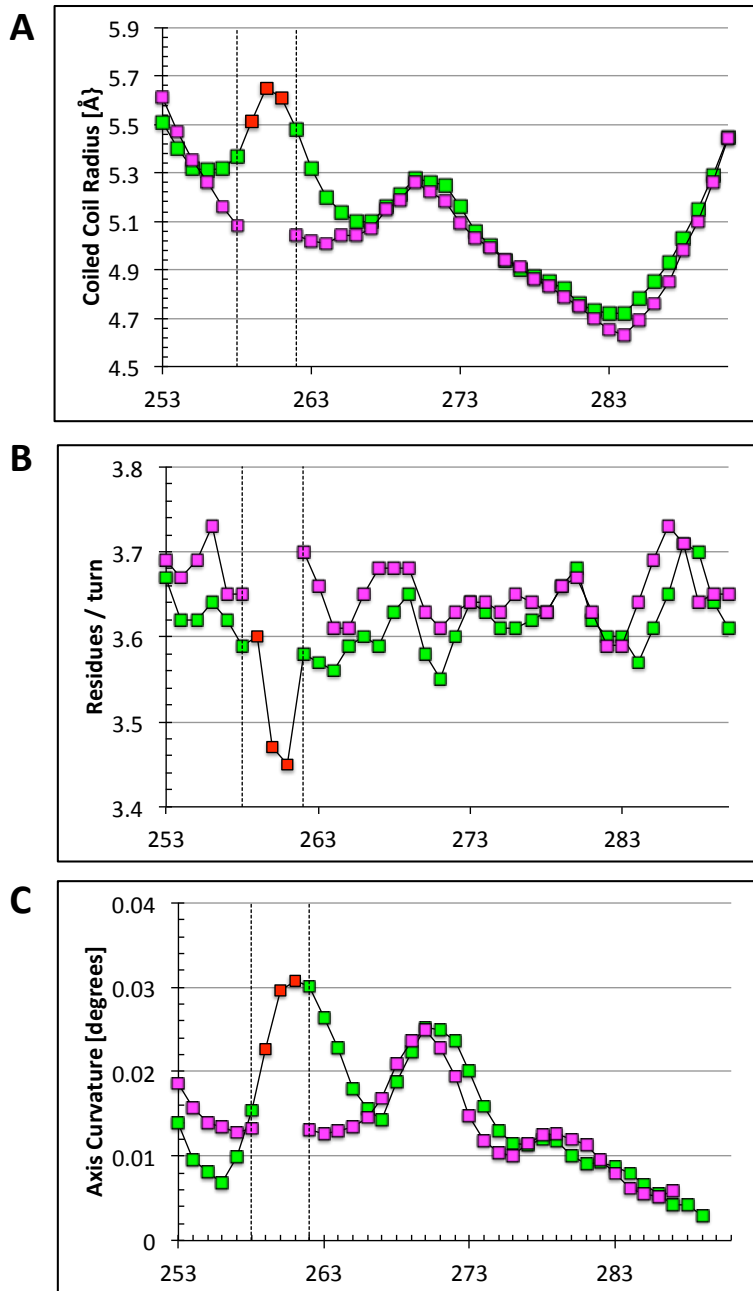

**Supplementary Figure 3: Comparison of coiled coil parameters in MITF( $\Delta$ ) and MITF(*wt*). A)**

Coiled coil radius, B) residues/turn; C) axis curvature. Geometric effects caused by the stammer insert are propagated by different degrees towards the C-terminus of the structure and sequence. Color codes are as in **Figure 1**. The stammer segment is indicated by a vertical dashed line. The stammer residues in MITF(*wt*) are in red. Residue numbers are indicated.

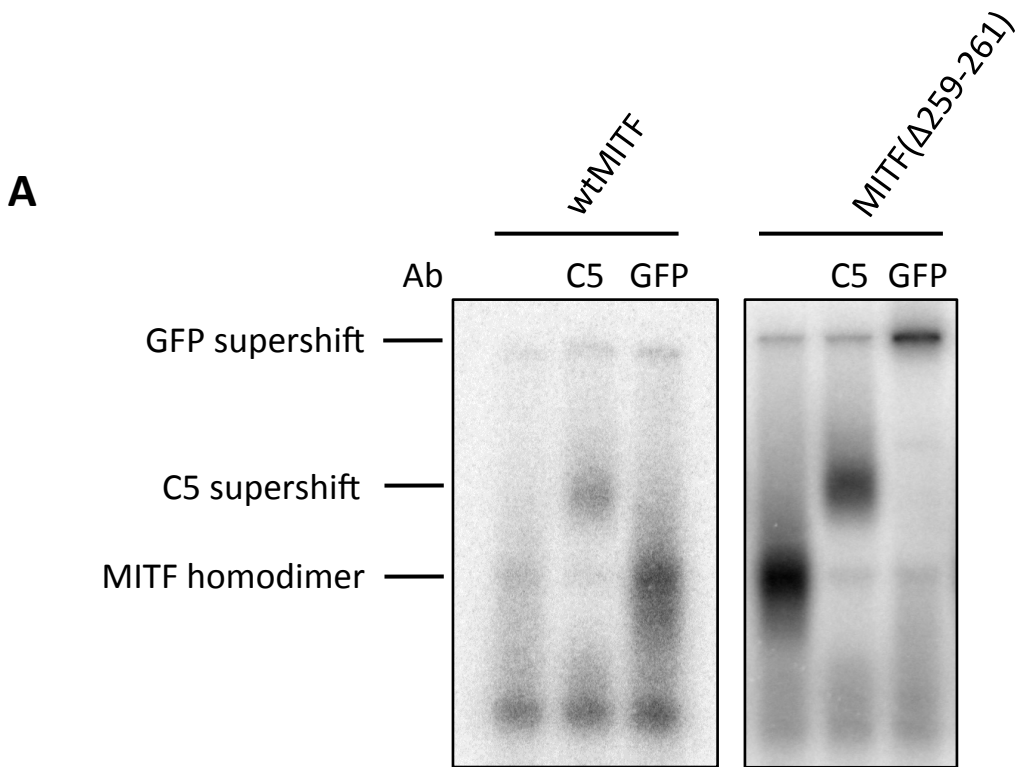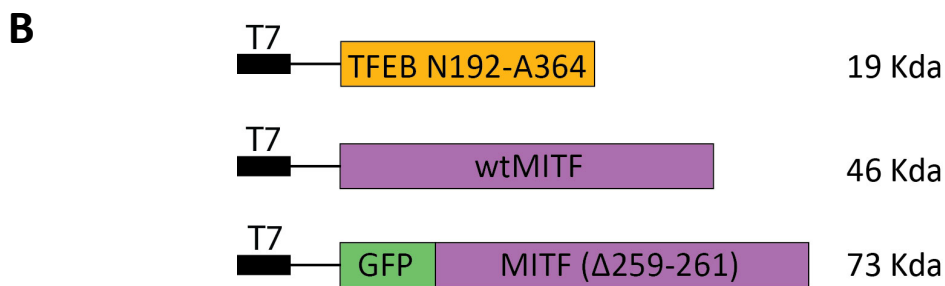

**Supplementary Figure 4: EMSA control data.** A) EMSA showing the specific supershifts of MITF(*wt*) and GFP-tagged MITF ( $\Delta$ ) with the anti-MITF (C5) antibody, and anti-GFP antibodies, respectively. (B) Scheme of the constructs utilized for the *in vitro* translation of the proteins assayed in the EMSAs.



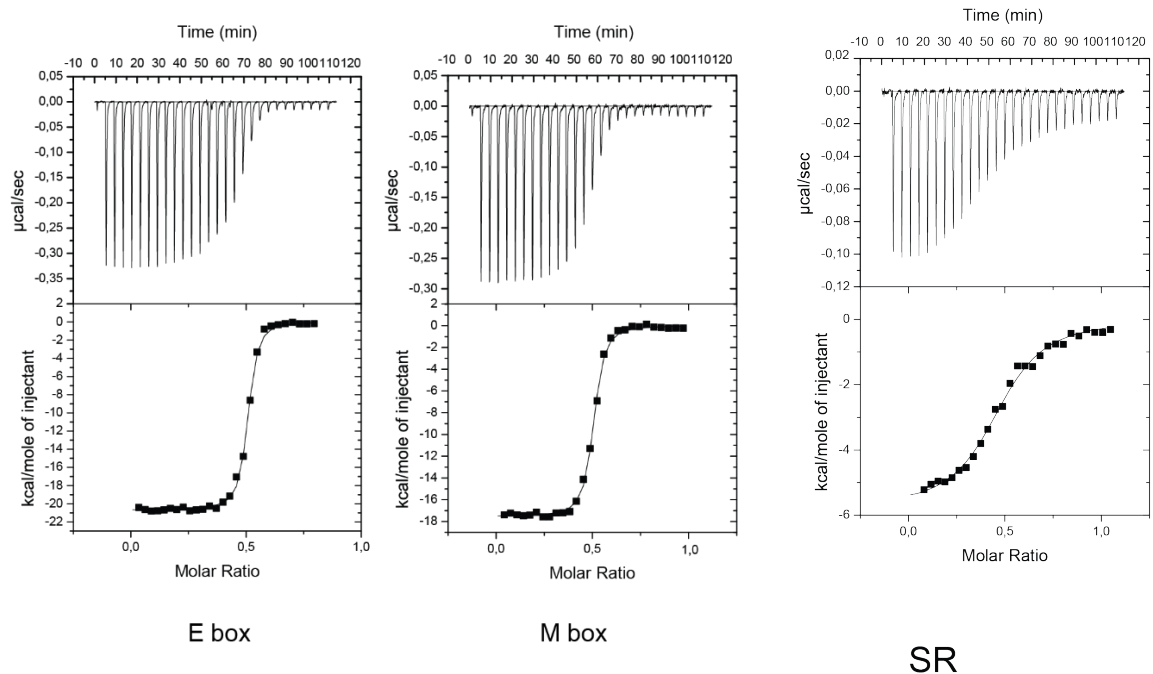

**Supplementary Figure 5: MITF( $\Delta$ )/DNA interactions measured by ITC.** Upper panels, raw titration data; lower panel, integrated data fits.

## References

1. Wiederstein, M., Gruber, M., Frank, K., Melo, F. and Sippl, M.J. (2014) Structure-based characterization of multiprotein complexes. *Structure*, **22**, 1063-1070.
